# Supplementary material
Source: publisher figshare collection journal article supplement (https://frontiersin.figshare.com/ndownloader/files/20261544)
Supplement: Supplementary file [file 20261544]

**SUPPLEMENTARY FIGURES**

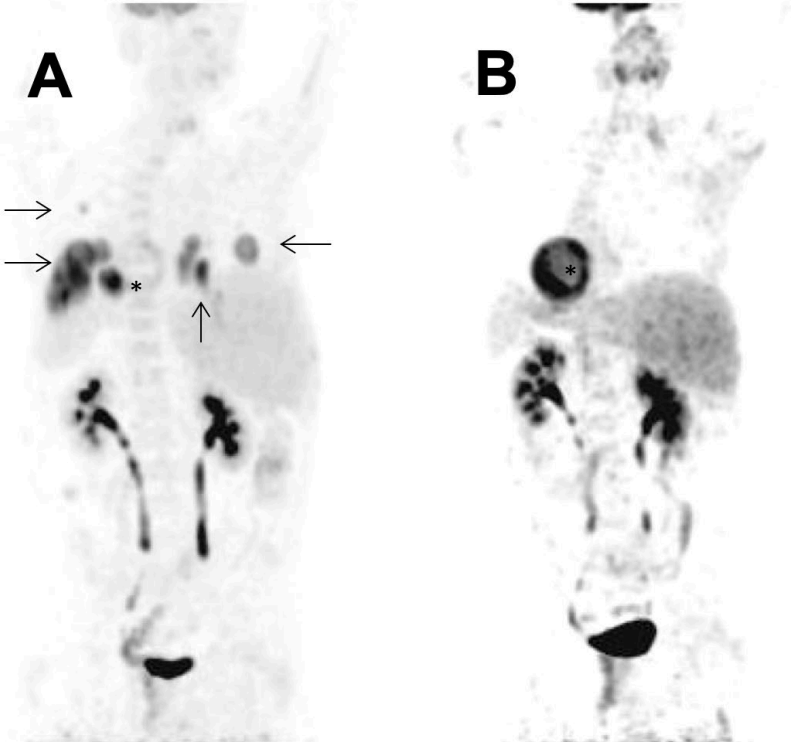

*Supplementary Figure 1*

**PET-CT during disease course.** **A:** Multiple PTLD manifestations at day +228 post alloHSCT, **B:** Complete remission of PTLD one year after diagnosis; \*: FDG-activity heart muscle.

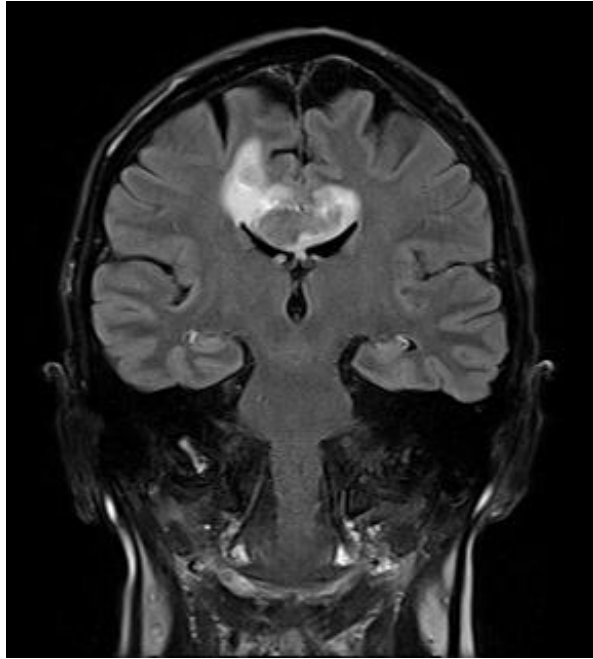

*Supplementary Figure 2*

Cerebral MRI at day +300 post alloHSCT. Lymphoma typical lesion interpreted as PTLD manifestation (T1, gadolinium)

## SUPPLEMENTARY TABLES

|                     | HLA-A     |           | HLA-B     |           | HLA-C  |           | HLA-DRB1 |        | HLA-DQ |        |
|---------------------|-----------|-----------|-----------|-----------|--------|-----------|----------|--------|--------|--------|
| <b>Patient</b>      | 01:01P    | 03:01P    | 08:01P    | 35:01P    | 07:01P | 04:01P    | 01:01P   | 03:01P | 05:01P | 02:01P |
| <b>T-cell Donor</b> | 01:01:01G | 03:01:01G | 08:01:01G | 35:01:01G | 07:01P | 04:01:01G | 15:01P   | 03:01P | 06:02P | 02:01P |

### *Supplementary Table 1A*

Matching of HLA-alleles in PTLD patient following alloHSCT and third-party donor of EBV-specific T-lymphocytes.

| <i>time point of administration</i> | <i>EBNA1/Select-specific T-cell dosage</i> |
|-------------------------------------|--------------------------------------------|
| November 2016                       | 1.0 x 10 <sup>4</sup> CD3+ cells/kg *      |
| December 2016                       | 0.5 x 10 <sup>4</sup> CD3+ cells/kg +      |
| January 2017                        | 0.5 x 10 <sup>4</sup> CD3+ cells/kg +      |
| March 2017                          | 1.0 x 10 <sup>4</sup> CD3+ cells/kg *      |
| May 2017                            | 0.5 x 10 <sup>4</sup> CD3+ cells/kg +      |
| July 2017                           | 0.5 x 10 <sup>4</sup> CD3+ cells/kg +      |

\* fresh, + cryopreserved

### *Supplementary Table 1B*

Scheduling and dosing of EBV-specific T-cell administration. EBV-specific T-cells were selected twice from the same unrelated donor and were prepared based on interferon- $\gamma$  release following stimulation with EBV EBNA1 and EBV Select peptide pools, as previously reported<sup>9,10</sup>.
